# Supplementary material for: Relation between synthesis conditions, dopant position and charge carriers in aluminium-doped ZnO nanoparticles
Source: Royal Society of Chemistry journal article supplement (doi:10.1039/c3ra41847b), 2013-01-01
Supplement: c3ra41847b.pdf [file c3ra41847b.pdf]

Supporting information

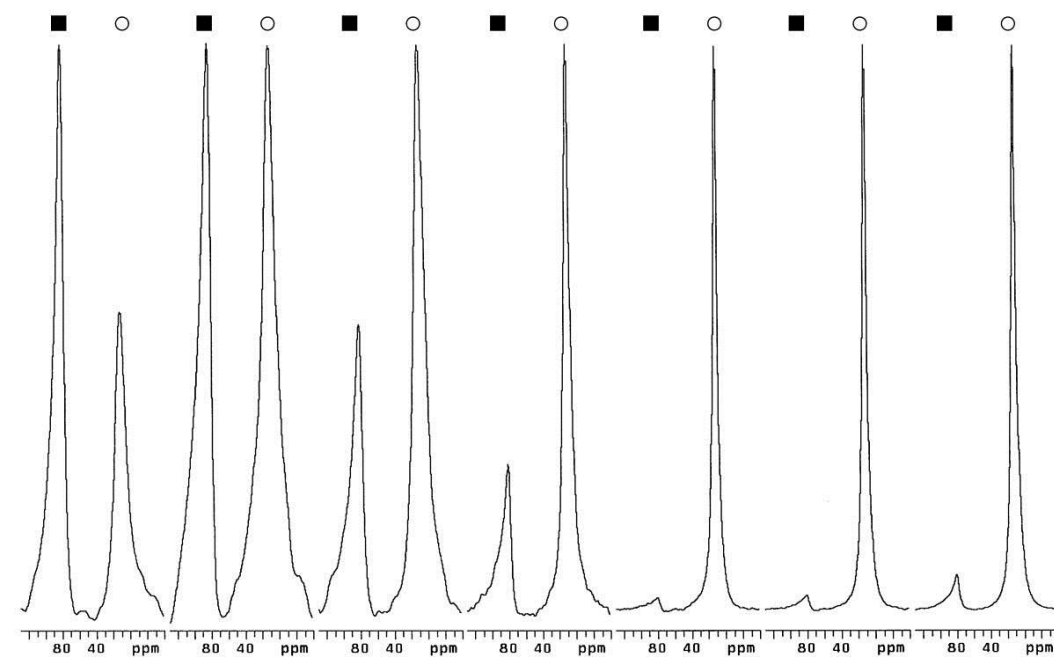

**Figure S1.**  $^{27}\text{Al}$ -NMR spectra of the nano-equiaxed series: 0.5 at% Al (a), 1 at% Al (b), 1.5 at% Al (c), 2 at% Al (d), 2.5 at% Al (e), 3 at% Al (f) and 5 at% Al (g). ■-symbols correspond with tetrahedral Al, ○-symbols correspond with octahedral Al.

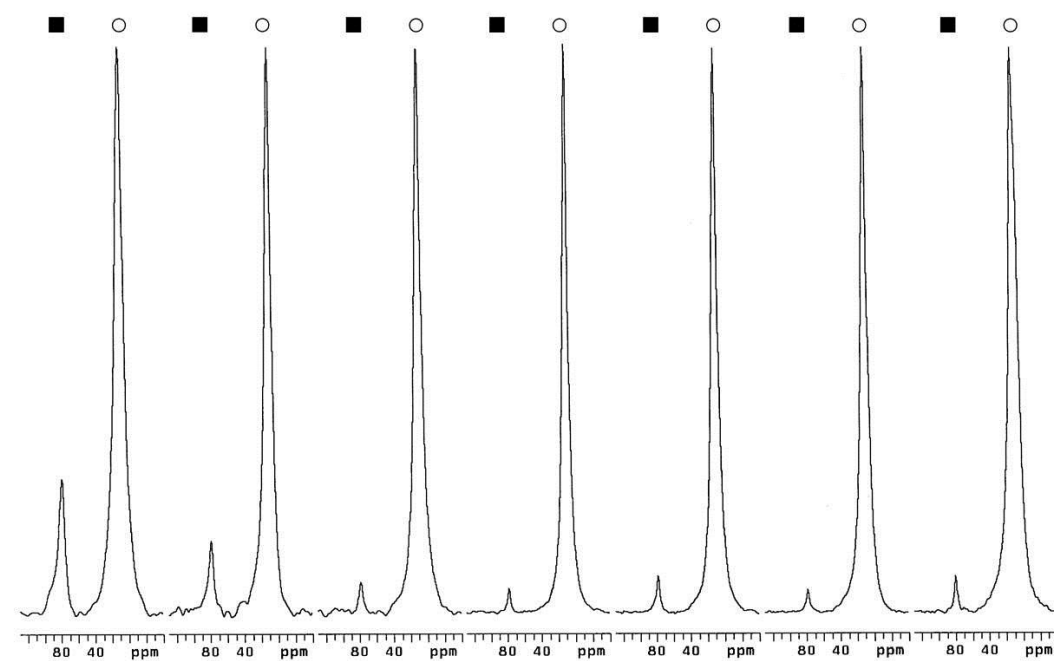

**Figure S2.**  $^{27}\text{Al}$ -NMR spectra of the nanorod series: 0.5 at% Al (a), 1 at% Al (b), 1.5 at% Al (c), 2 at% Al (d), 2.5 at% Al (e), 3 at% Al (f) and 5 at% Al (g). ■-symbols correspond with tetrahedral Al, ○-symbols correspond with octahedral Al.
